# Supplementary material for: Perceived Health Impact and Usage of Public Green Spaces in Brussels' Metropolitan Area During the COVID-19 Epidemic
Source: Frontiers journal article supplement (doi:10.3389/frsc.2021.668443), 2021-06-03
Supplement: Data_Sheet_1.docx [file Data_Sheet_1.docx]

**Appendix**

**Annex 1:** Map showing the geographical situation of the parks where the interviews were conducted within the Brussels-Capital Region (Sources:Regional roads from Brussels.mobility; grass cover from Ubris map. Retrieved from: <https://geobru.irisnet.be/en/catalogue/>)


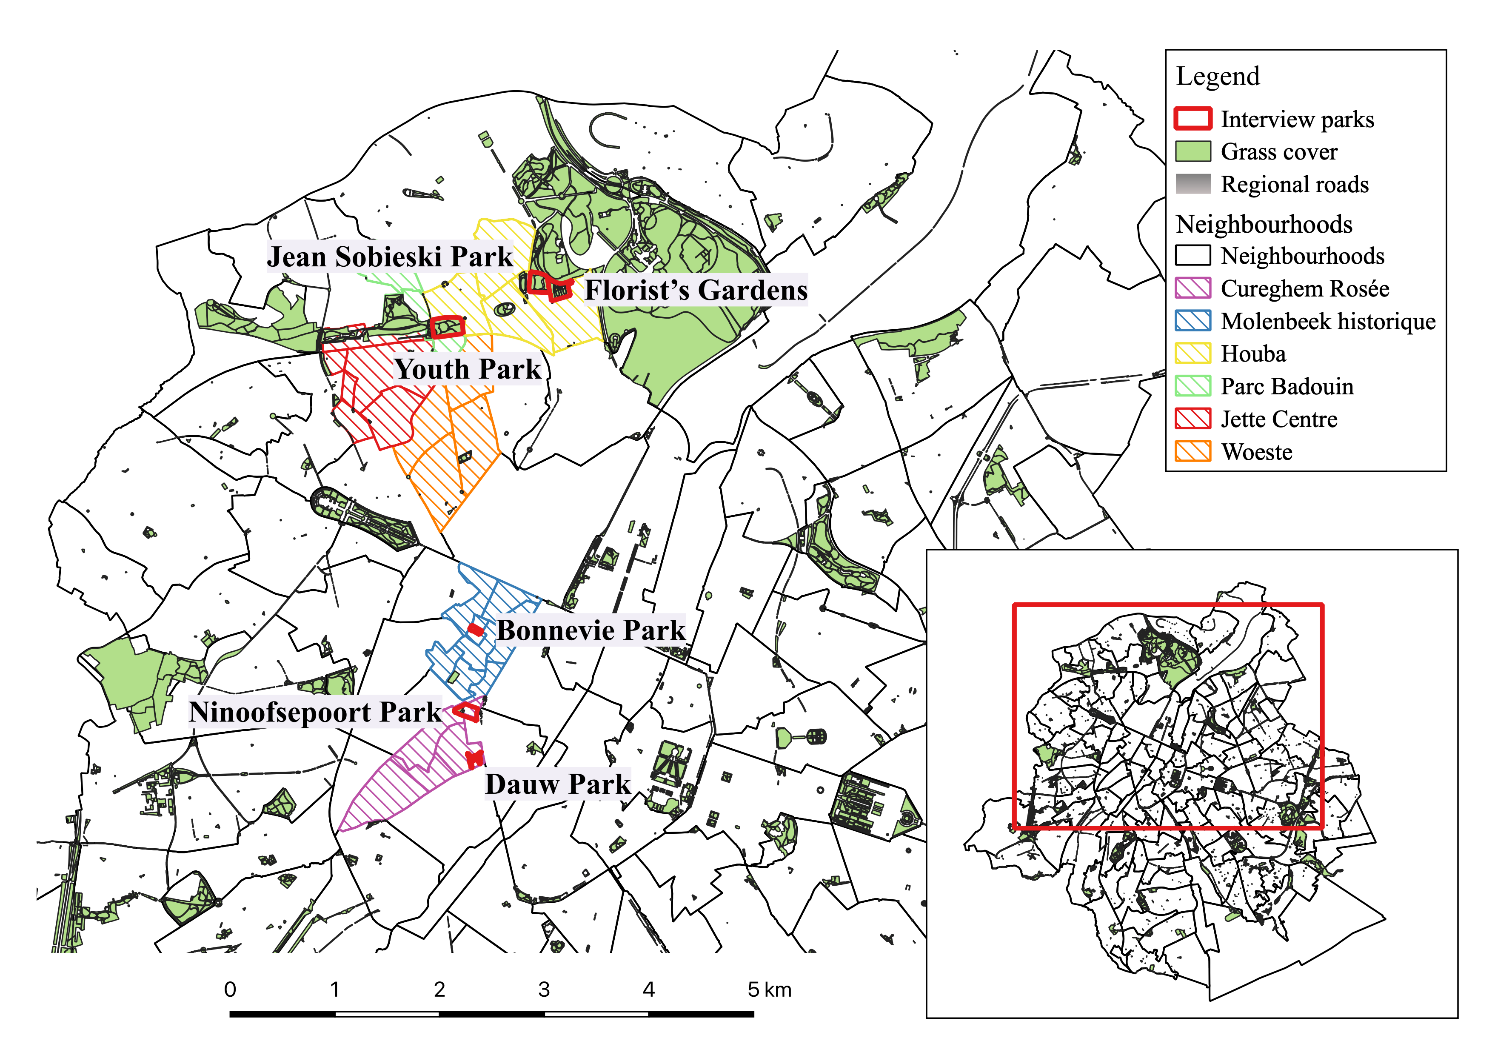


**Annex 2:** Sociodemographic, socioeconomic and environmental characteristics and health status of the population living in the neighbourhoods of the PGSs where the interviews were conducted, compared to the BCR mean value (Source: Data retrieved from IBSA-BISA (in English: Brussels Institute for Statistics and Analytics) (Link: <https://monitoringdesquartiers.brussels/>)).

| **Neighbourhoods** | **Cureghem Rosée** | | **Molenbeek Historique** | **Houba** | | **Parc Baudouin - Dielegembos** | **Jette Centre** | **Woeste** | **Regional mean** |
| --- | --- | --- | --- | --- | --- | --- | --- | --- | --- |
| **Parks** | **Ninoofsepoort Park** | **Dauw Park** | **Bonnevie Park** | **Jean Sobieski Park** | **Florist’s Gardens** | **Youth Park** | | |
| **Sociodemographic characteristics** | | | | | | | | | | |
| Population density (per km²) in 2020 | 8801.3 | | 24908.4 | 15019.5 | | 187.7 | 13505.3 | 18712.1 | 7500.7 |
| Proportion of residents of Northern African origin’ (%) in 2019 | 7.1 | | 8.9 | 4.7 | | NA | 2.4 | 3.7 | 3.4 |
| Percentage of the population aged 65 years and older living alone among total private households (%) in 2019 | 5.4 | | 7.0 | 10.9 | | NA | 12.6 | 11.8 | 11.4 |
| **Socioeconomic characteristics** | | | | | | | | | | |
| Percentage of population aged <18 years old living in a household without earnings (%) in 2016 | 26.8 | | 24.7 | 18.0 | | NA | 11.16 | 16.00 | 16.2 |
| Median net taxable income (€) in 2018 | 15279 | | 15345 | 18627 | | NA | 22169 | 19973 | 19723 |
| **Environmental factors** | | | | | | | | | | |
| Share of the population living near a green space open to the public (%) in 2012 | 27.0 | | 44.4 | 84.2 | | 100.0 | 93.2 | 67.5 | 81.8 |
| Annual mean daily concentrations of NOx (µg/m³) in 2001 | 48.9 | | 40.4 | 24.3 | | 7.7 | 20.7 | 19.0 | 31.5 |
| **Health indicator** | | | | | | | | | | |
| Share of the population reporting poor self-perceived health (%) in 2001 | 28.4 | | 29.3 | 31.1 | | NA | 27.5 | 29.8 | 27.2 |
| Note: NA = Not available.  The Ninoofsepoort Park and Dauw Park are situated in the Cureghem Rosée neighbourhood; Bonnevie Park is situated in Molenbeek Historique; Jean Sobieski Park and the Florist’s Gardens are situated in Houba; and the Youth Park is situated between the neighbourhoods Parc Baudouin – Dielegembos, Jette Centre and Woeste. | | | | | | | | | | |

**Annex 3:** Questionnaire

| **Main question** | **Probing questions** |
| --- | --- |
| When I say to you “park during the coronavirus epidemic”, what images, associations, words, feelings or reactions come to your mind spontaneously? | - Probe - During lockdown versus non-lockdown situation? |
| Has coronavirus changed your experience of the park? | - During lockdown versus non-lockdown situation? |
| Since coronavirus, have there been elements that have had a negative impact on your experiences in the park, or that you experience differently compared to the pre-coronavirus period? (e.g. high concentration of people, face mask behaviour, people who cough, intimacy between people, etc.) | - During lockdown versus non-lockdown situation? |
| How has your park usage changed since coronavirus? | - - **Different frequency?** More or less since coronavirus? Why?   - **Different PGSs?** Why? What makes these PGSs more/less attractive? Are there any specific PGSs you have been avoiding since coronavirus?   - **Different times?** Why? To avoid other people? To meet other people?   - **Other activities?** Are there any activities you have stopped doing in the park, or activities that you have started doing in the park since coronavirus?   - **Under certain weather conditions?** Impact on the risk of infection? Impact on crowdedness?   - **More alone or more in company?** |
| How did your park usage change during the lockdown in March/November? | - - **Different frequency?** More or less since coronavirus? Why?   - **Different PGSs?** Why? What makes these PGSs more/less attractive? Are there any specific PGSs you have been avoiding since coronavirus?   - **Different times?** Why? To avoid different people? To meet different people?   - **Different activities?** Are there any activities you have stopped doing in the park, or activities that you have started doing in the park since coronavirus?   - **Under certain weather conditions?** Impact on the risk of infection? Impact on crowdedness? - **More alone or more in company?** |
| Do you feel any tension or irritation or do you experience or observe conflicts in the park due to Covid? | - During lockdown versus non-lockdown situation? |
| Does the park have an impact on your health during the coronavirus epidemic? | - Positive? Negative? - Physically? Mentally? - Why? - During lockdown versus non-lockdown situation? |
| During the coronavirus epidemic, are there certain needs that the park can meet that cannot be fulfilled by another location/activity? What can the park offer you that other locations cannot? What can visiting the park offer that no other activity could? | - - Mental needs?   - Physical needs?   - Social needs? - During lockdown versus non-lockdown situation? |
| If I asked you to take a picture of the park during the coronavirus epidemic, what would that picture be? Describe the image. | - What does this mean to you? - What feelings, emotions, concerns does this raise in you? |
| Can you complete the following sentence? For me, a park during the coronavirus epidemic is (like)… |  |
| Can you complete the following sentence? For me, a park during the lockdown was (like)… |  |
| Do you think there are things that could be done differently to improve park visits during an epidemic and safeguard its visitors? |  |
| Has the value you place on parks changed since coronavirus? | - How? - Why? |
| What message would you like to convey or what policies would you recommend to local policy-makers regarding parks in general or more specifically during an epidemic? |  |
